# Supplementary material
Source: PubMed Central journal article supplement (PMC5915787)
Supplement: JB.00704-17_zjb999094739s1.pdf [file JB.00704-17_zjb999094739s1.pdf]

## Supplementary Materials

The *Pseudomonas aeruginosa* PrrF1 and PrrF2 small regulatory RNAs (sRNAs) promote 2-alkyl-4-quinolone production through redundant regulation of the *antR* mRNA

Louise Djapgne<sup>1</sup>, Subrata Panja<sup>2</sup>, Luke Brewer<sup>1</sup>, Jonathan Gans<sup>1</sup>, Maureen A. Kane<sup>1</sup>, Sarah A. Woodson<sup>2\*</sup>, Amanda G. Oglesby-Sherrouse<sup>1,3\*</sup>

<sup>1</sup>University of Maryland School of Pharmacy, Department of Pharmaceutical Sciences,  
Baltimore, MD 21201

<sup>2</sup>Johns Hopkins University, Krieger School of Arts and Sciences, Department of Biophysics,  
Baltimore MD 21218

<sup>3</sup>University of Maryland, School of Medicine, Department of Microbiology and Immunology,  
Baltimore, MD 21201

Keywords: *Pseudomonas aeruginosa*, PrrF, PQS, Hfq, iron, antR

\*To whom correspondence should be sent: Amanda G. Oglesby-Sherrouse:

[aoglesby@rx.umaryland.edu](mailto:aoglesby@rx.umaryland.edu) or Sarah A. Woodson: [swoodson@jhu.edu](mailto:swoodson@jhu.edu)

**Table S1. Strains and plasmids used in this study**

| Name                                                                                       | Description                                                                                                                                                                                                               | Reference                             |
|--------------------------------------------------------------------------------------------|---------------------------------------------------------------------------------------------------------------------------------------------------------------------------------------------------------------------------|---------------------------------------|
| <b>Plasmids</b>                                                                            |                                                                                                                                                                                                                           |                                       |
| Mini-CTX1- <i>lacZ</i>                                                                     | Integration-proficient plasmid containing a promoterless <i>lacZY</i> gene                                                                                                                                                | (1)                                   |
| Mini-CTX1-P <sub><i>antR</i></sub> '- <i>lacZ</i>                                          | Mini-CTX1- <i>lacZ</i> with the <i>antR</i> promoter (67 nt upstream of the transcriptional start site) cloned into the MCS                                                                                               | This study                            |
| Mini-CTX1-' <i>lacZ</i> <sup>SD</sup>                                                      | Mini-CTX1- <i>lacZ</i> with the Shine-Dalgarno site deleted                                                                                                                                                               | This study                            |
| Mini-CTX1-P <sub><i>antR</i></sub> '- <i>lacZ</i> <sup>SD</sup>                            | Mini-CTX1- <i>lacZ</i> <sup>SD</sup> with the <i>antR</i> promoter (67 nt upstream of the +1 transcriptional start site) and UTR (15 nt downstream of the +1 translational start site) cloned into the MCS                | This study                            |
| Mini-CTX1-alt-P <sub><i>antRA</i></sub> '- <i>lacZ</i> <sup>SD</sup>                       | Mini-CTX1-P <sub><i>antR</i></sub> '- <i>lacZ</i> <sup>SD</sup> with mutations as described in Figure 2 for Alt AntrA                                                                                                     | This study                            |
| Mini-CTX1-alt-P <sub><i>antRB</i></sub> '- <i>lacZ</i> <sup>SD</sup>                       | Mini-CTX1-P <sub><i>antR</i></sub> '- <i>lacZ</i> <sup>SD</sup> with mutations as described in Figure 2 for Alt AntrB                                                                                                     | This study                            |
| Mini-CTX1-alt-P <sub><i>antRC</i></sub> '- <i>lacZ</i> <sup>SD</sup>                       | Mini-CTX1-P <sub><i>antR</i></sub> '- <i>lacZ</i> <sup>SD</sup> with mutations as described in Figure 2 for Alt AntrC                                                                                                     | This study                            |
| Mini-CTX1-P <sub><i>lac</i></sub> '- <i>lacZ</i> <sup>SD</sup>                             | Mini-CTX1-' <i>lacZ</i> <sup>SD</sup> with the native P <sub><i>lac</i></sub> promoter inserted into the MCS                                                                                                              | Susana Maurino-Lopez and Angela Wilks |
| Mini-CTX1-P <sub><i>lac</i></sub> -UTR <sub><i>antR</i></sub> '- <i>lacZ</i> <sup>SD</sup> | Mini-CTX1-P <sub><i>lac</i></sub> '- <i>lacZ</i> <sup>SD</sup> with the <i>antR</i> UTR (from the +1 transcriptional start site to 15 nt downstream of the +1 translational start site) cloned into the MCS               | This study                            |
| <b>Strains</b>                                                                             |                                                                                                                                                                                                                           |                                       |
| Top 10 <i>E. coli</i>                                                                      | F- <i>mcrA</i> Δ( <i>mrr</i> - <i>hsdRMS</i> - <i>mcrBC</i> ) Φ80 <i>lacZ</i> ΔM15 Δ <i>lacX74</i> <i>recA1</i> <i>araD139</i> Δ( <i>araleu</i> )7697 <i>galU</i> <i>galK</i> <i>rpsL</i> (StrR) <i>endA1</i> <i>nupG</i> | Invitrogen                            |
| DH5 α                                                                                      | F- Φ80 <i>lacZ</i> ΔM15 Δ( <i>lacZYA</i> - <i>argF</i> ) U169 <i>recA1</i> <i>endA1</i> <i>hsdR17</i> ( <i>rK</i> -, <i>mK</i> +) <i>phoA</i> <i>supE44</i> λ- <i>thi-1</i> <i>gyrA96</i> <i>relA1</i>                    | (2)                                   |
| SM10 λ <i>pir</i>                                                                          | <i>E. coli</i> strain used for conjugation: <i>pirR6K</i>                                                                                                                                                                 | (2)                                   |
| SM10/pFLP                                                                                  | SM10 carrying the pFLP recombinase                                                                                                                                                                                        | (3)                                   |
| PAO1                                                                                       | <i>P. aeruginosa</i> laboratory strain                                                                                                                                                                                    | (4)                                   |
| Δ <i>prrF1</i>                                                                             | <i>prrF1</i> deletion in PAO1                                                                                                                                                                                             | (5)                                   |
| Δ <i>prrF2</i>                                                                             | <i>prrF2</i> deletion in PAO1                                                                                                                                                                                             | (5)                                   |
| Δ <i>prrF1,2</i>                                                                           | <i>prrF1,2</i> deletion in PAO1                                                                                                                                                                                           | (5)                                   |
| PAO1/P <sub><i>antR</i></sub> '- <i>lacZ</i>                                               | PAO1 with the P <sub><i>antR</i></sub> '- <i>lacZ</i> reporter fusion integrated at the chromosomal <i>att</i> site                                                                                                       | This study                            |
| Δ <i>prrF1</i> /P <sub><i>antR</i></sub> '- <i>lacZ</i> <sup>SD</sup>                      | Δ <i>prrF1</i> with the P <sub><i>antR</i></sub> '- <i>lacZ</i> <sup>SD</sup> reporter fusion integrated at the chromosomal <i>att</i> site                                                                               | This study                            |
| Δ <i>prrF2</i> /P <sub><i>antR</i></sub> '- <i>lacZ</i> <sup>SD</sup>                      | Δ <i>prrF2</i> with the P <sub><i>antR</i></sub> '- <i>lacZ</i> <sup>SD</sup> reporter fusion integrated at the chromosomal <i>att</i> site                                                                               | This study                            |
| Δ <i>prrF1,2</i> /P <sub><i>antR</i></sub> '- <i>lacZ</i> <sup>SD</sup>                    | Δ <i>prrF1,2</i> with the P <sub><i>antR</i></sub> '- <i>lacZ</i> <sup>SD</sup> reporter fusion integrated at the chromosomal <i>att</i> site                                                                             | This study                            |
| PAO1/altP <sub><i>antRA</i></sub> '- <i>lacZ</i>                                           | PAO1 with the altered P <sub><i>antRA</i></sub> '- <i>lacZ</i> reporter fusion integrated at the chromosomal <i>att</i> site                                                                                              | This study                            |
| PAO1/altP <sub><i>antRB</i></sub> '- <i>lacZ</i>                                           | PAO1 with the altered P <sub><i>antRB</i></sub> '- <i>lacZ</i> reporter fusion                                                                                                                                            | This study                            |

| Name                                                                          | Description                                                                                                                                                            | Reference  |
|-------------------------------------------------------------------------------|------------------------------------------------------------------------------------------------------------------------------------------------------------------------|------------|
|                                                                               | integrated at the chromosomal <i>att</i> site                                                                                                                          |            |
| PAO1/altP <sub>antR</sub> C-' <i>lacZ</i>                                     | PAO1 with the altered P <sub>antR</sub> C-' <i>lacZ</i> reporter fusion integrated at the chromosomal <i>att</i> site                                                  | This study |
| PAO1/P <sub>antR</sub> - <i>lacZ</i>                                          | PAO1 with the P <sub>antR</sub> - <i>lacZ</i> transcriptional fusion integrated at the chromosomal <i>att</i> site                                                     | This Study |
| $\Delta$ <i>prrF1,2</i> /P <sub>antR</sub> - <i>lacZ</i>                      | $\Delta$ <i>prrF1,2</i> with the P <sub>antR</sub> - <i>lacZ</i> transcriptional fusion integrated at the chromosomal <i>att</i> site                                  | This Study |
| PAO1/P <sub>lac</sub> -UTR <sub>antR</sub> '- <i>lacZ</i>                     | PAO1 with the P <sub>lac</sub> -UTR <sub>antR</sub> '- <i>lacZ</i> translational fusion integrated at the chromosomal <i>att</i> site                                  | This Study |
| $\Delta$ <i>prrF1,2</i> /P <sub>lac</sub> -UTR <sub>antR</sub> '- <i>lacZ</i> | $\Delta$ <i>prrF1,2</i> with the P <sub>lac</sub> -UTR <sub>antR</sub> '- <i>lacZ</i> <sup>SD</sup> translational fusion integrated at the chromosomal <i>att</i> site | This Study |

**Table S2. Parameters for Multiple Reaction Monitoring**

| Quinolone      | Q1 <i>m/z</i> | Q2 <i>m/z</i> | CE (V) | T Lens (V) |
|----------------|---------------|---------------|--------|------------|
| C7-PQS         | 260.1         | 175.1         | 29     | 99         |
| C9-PQS         | 288.1         | 175.1         | 29     | 125        |
| HHQ            | 244.1         | 159.1         | 30     | 110        |
| NHQ            | 272.1         | 159.1         | 32     | 128        |
| HQNO           | 260.1         | 159.1         | 27     | 114        |
| NQNO           | 288.1         | 159.1         | 30     | 105        |
| Naladixic Acid | 233.1         | 187.1         | 25     | 79         |

**Table S3. Primers used in this study**

| Name                                                | Sequence                                      |
|-----------------------------------------------------|-----------------------------------------------|
| <i>Translational reporter fusion construction</i>   |                                               |
| LacZ <sup>SD</sup> .for                             | aagcttatgacatgattacggattcactggc               |
| LacZ <sup>SD</sup> .rev                             | atcgataatttcaccgcccgaagggcggtgcc              |
| antR <sub>67</sub> .for                             | gaattcgaccggcgcttgccggcgac                    |
| antR <sub>67</sub> .rev                             | cgtgtcgagtgccgaacgatgatgcgacccatccc           |
| alt-antRA.for                                       | gccgaacctgatgcgacccatcccgtcg                  |
| alt-antRA.rev                                       | gcgacgggatgggtgcatcatggttcggc                 |
| alt-antRB.for                                       | gcacccccagccttcgggtgctgagtgccg                |
| alt-antRB.rev                                       | cggcactcgaccccgaaggctgggggtgc                 |
| alt-antRC.for                                       | cgctgcccgaacctggcaaggacccatcccgtcg            |
| alt-antRC.rev                                       | cgacgggatgggtccttgccatggttcggcactcg           |
| antR-UTR.for                                        | ggatccggggagccggccttgccggcatat                |
| antR-UTR.rev                                        | aagcttatgggtcctcatcatggtt                     |
| <i>Transcriptional reporter fusion construction</i> |                                               |
| antR-promoter.for                                   | gaattcgagcggcgcttgccggcgacgctt                |
| antR-promoter.rev                                   | aagcttcgcatcctccactatccggatag                 |
| <i>Primers for transcription</i>                    |                                               |
| PrrF1.for                                           | gtgtaatacgactcactataggg-caactggtcgcgagatcagcc |
| PrrF1.rev                                           | aaaaaaagaccggcaagtgccgggtcaa                  |
| PrrF2.for                                           | gtgtaatacgactcactataggg-caactggtcgcgaggccagca |
| PrrF2.rev                                           | aaaaaaagaccggcaagtgccgggtcga                  |
| 5'UTR antR.for                                      | gtgtaatacgactcactataggg-gagccggccttgccggca    |
| 5'UTR antR.rev                                      | catggagatcgccacgatcggcgacggg                  |
| <i>5' RACE</i>                                      |                                               |
| antR.rev                                            | cctcgacacggccccgcccgc                         |
| antR.nested                                         | acgggatgggtcctcatcat                          |

**Figure S1. 5' RACE of the *antR* transcriptional start site (TSS).** The TSS of the *antR* mRNA ( $\ddagger$ ) was determined by 5' RACE of RNA isolate from iron-replete conditions as described in the Materials and Methods. Fragments for translational fusions were cloned from -67 upstream of the transcriptional start site ( $\ddagger$ ) identified in this study to +15 downstream of the translational start site (+). Numbers above the sequence indicate the distance from the transcriptional start site identified in this study. The region predicted to pair with the PrrF sRNAs is underlined and in black. The AntR binding site previously identified by Kim, et al, is underlined in purple. The transcriptional start site previously identified by Wurtzel, et al, is indicated by a (\*), and the putative RpoN binding site upstream of the longer transcript start site is underlined in red. Fragments for *antR* *in vitro* transcription were generated from nucleotides 1 at the transcriptional start site ( $\ddagger$ ) to +42 downstream of translational start site.

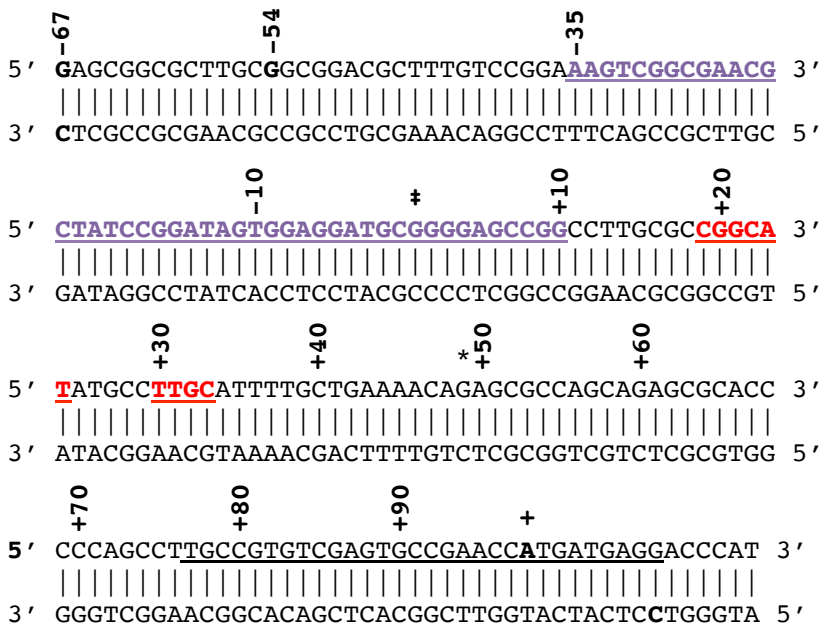

**Figure S2. RNase footprinting of PrrF2 sRNA with Pa-Hfq. A-B.** Partial digestion of PrrF2 with RNase If in the presence of the indicated amount of *Pa* Hfq protein, as in Figure 4. **B.** SAFA (Semi Automated Footprinting Analysis) analysis of the band intensities. **C.** PrrF2 sRNA secondary structure derived from the RNase partial digestion.

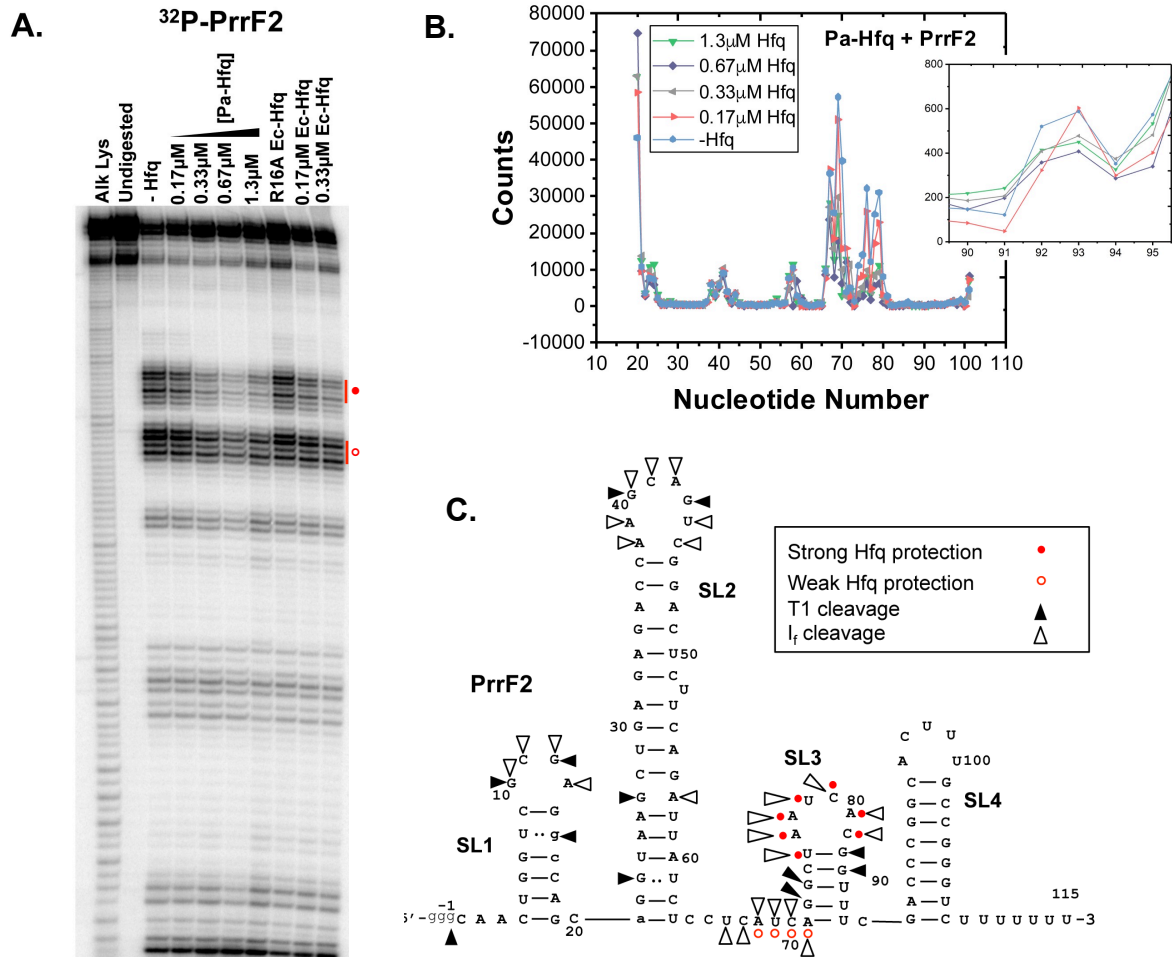

**Figure S3. Ec-Hfq protects PrrF1 and PrrF2 at lower concentrations than Pa-Hfq.** SAFA (Semi Automated Footprinting Analysis) analysis of RNase protection of PrrF1 (A-C) and PrrF2 (D-F) sRNAs with *Pa* Hfq (A, D), *Ec* Hfq, and R16A *Ec* Hfq proteins (B, E). Regions showing significant protection by the Hfq proteins are expanded in C and F.

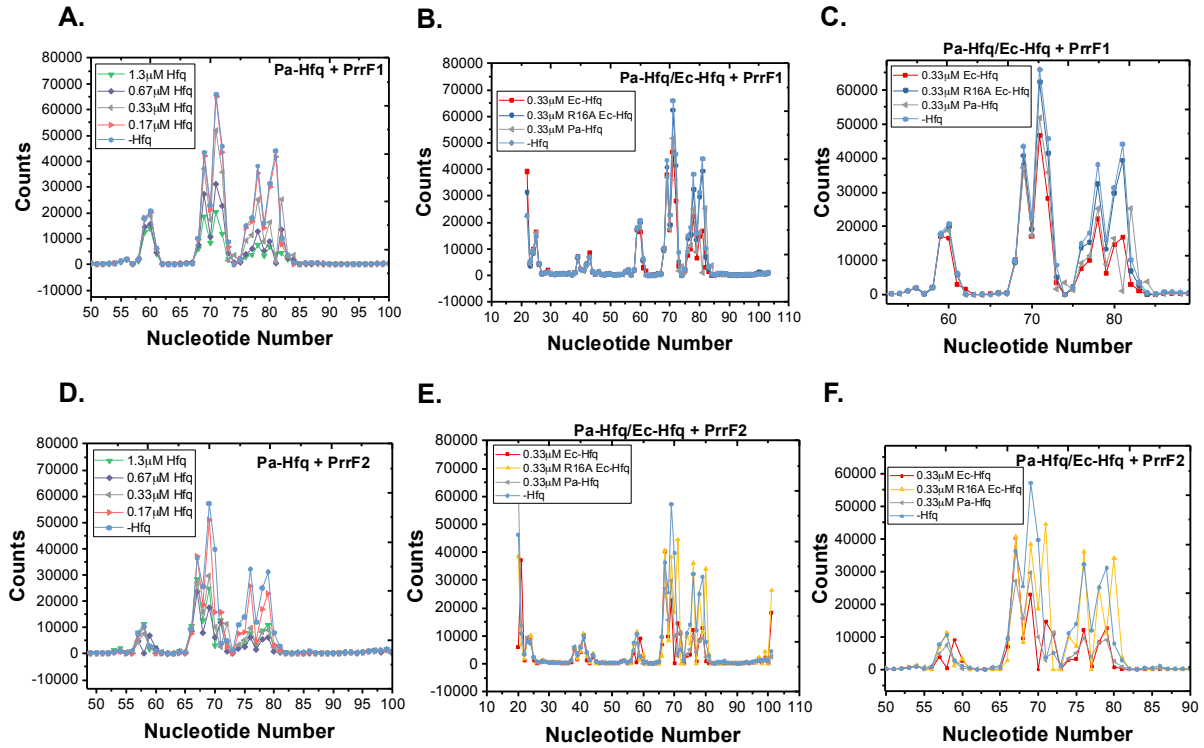



**Figure S4. *Pa* Hfq equilibrium binding to PrrF2 sRNA.** (A) Incubation of  $^{32}\text{P}$ -labeled PrrF2 with 0 – 667 nM Hfq<sub>6</sub>. The first shift (P2•H(I)) was due to one hexamer binding to PrrF2 and the second shift (P2•H(II)) was due to two or more hexamers binding to PrrF2. (B) Fractions of P2•H(I) and P2•H(II) complexes were fit to eq. (1) to obtain the dissociation constants.

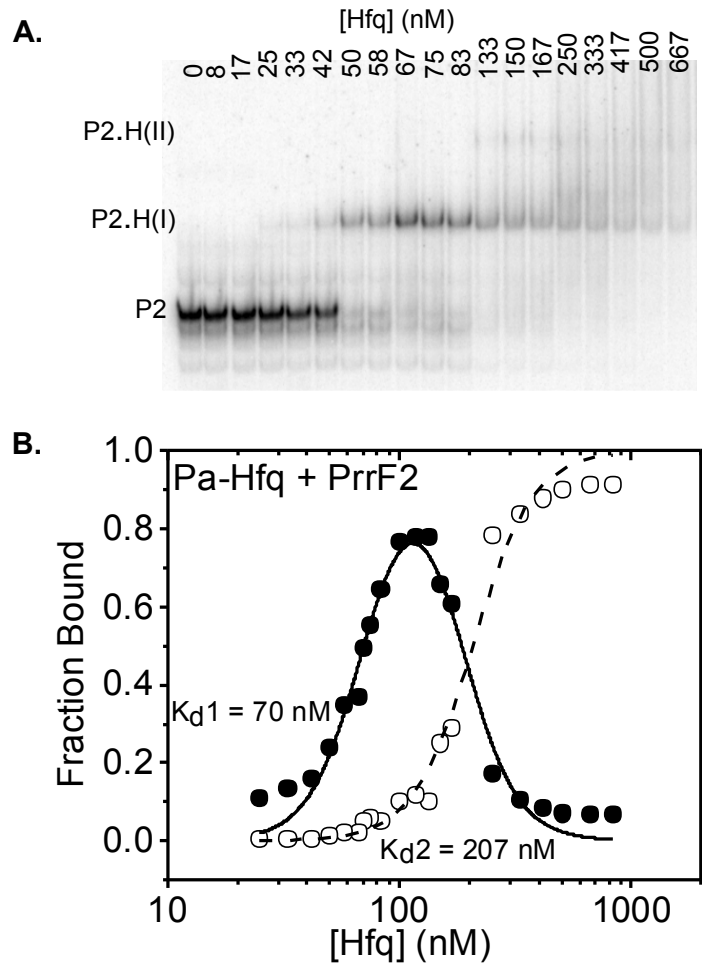

**Figure S5. Equilibrium binding of *Pa* Hfq with A18 RNA.** The dissociation constant of *Pa* Hfq with an unstructured A18-FAM RNA was determined by fluorescence anisotropy as previously described (6).

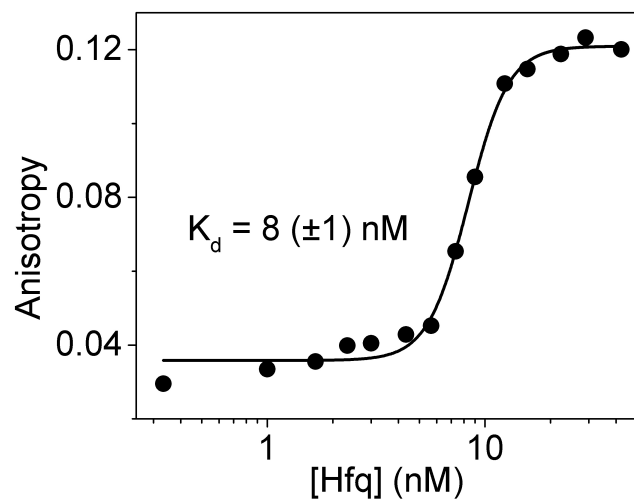

## References

1. Hoang TT, Kutchma AJ, Becher A, Schweizer HP. 2000. Integration-proficient plasmids for *Pseudomonas aeruginosa*: site-specific integration and use for engineering of reporter and expression strains. *Plasmid* 43:59-72.
2. Taylor RK, Manoil C, Mekalanos JJ. 1989. Broad-host-range vectors for delivery of TnpA: use in genetic analysis of secreted virulence determinants of *Vibrio cholerae*. *J Bacteriol* 171:1870-1878.
3. Hoang TT, Karkhoff-Schweizer RR, Kutchma AJ, Schweizer HP. 1998. A broad-host-range Flp-FRT recombination system for site-specific excision of chromosomally-located DNA sequences: application for isolation of unmarked *Pseudomonas aeruginosa* mutants. *Gene* 212:77-86.
4. Holloway BW. 1955. Genetic recombination in *Pseudomonas aeruginosa*. *J Gen Microbiol* 13:572-581.
5. Wilderman PJ, Sowa NA, FitzGerald DJ, FitzGerald PC, Gottesman S, Ochsner UA, Vasil ML. 2004. Identification of tandem duplicate regulatory small RNAs in *Pseudomonas aeruginosa* involved in iron homeostasis. *PNAS* 101:9792-9797.
6. Santiago-Frangos A, Kavita K, Schu DJ, Gottesman S, Woodson SA. 2016. C-terminal domain of the RNA chaperone Hfq drives sRNA competition and release of target RNA. *Proceedings of the National Academy of Sciences of the United States of America* 113:E6089-E6096.
